# Supplementary material for: Designable core–shell graphite particles for thermally conductive and electrically insulating polymer composites
Source: Royal Society of Chemistry journal article supplement (doi:10.1039/c8ra01946k), 2018-01-01
Supplement: c8ra01946k1.pdf [file c8ra01946k1.pdf]

## SUPPORTING INFORMATION

# Designable core-shell graphite particles for thermally conductive and electrically insulating polymer composites

Takashi Hirahara<sup>a\*</sup>

<sup>a</sup> DuPont Kabushiki Kaisha, Transportation and Advanced Polymers, 19-2 Kiyohara  
Kogyodanchi, Utsunomiya-shi, Tochigi 321-3231, Japan.

\*Corresponding author, Electronic mail: [takashi.hirahara@dupont.com](mailto:takashi.hirahara@dupont.com)

### Supplementary Figures

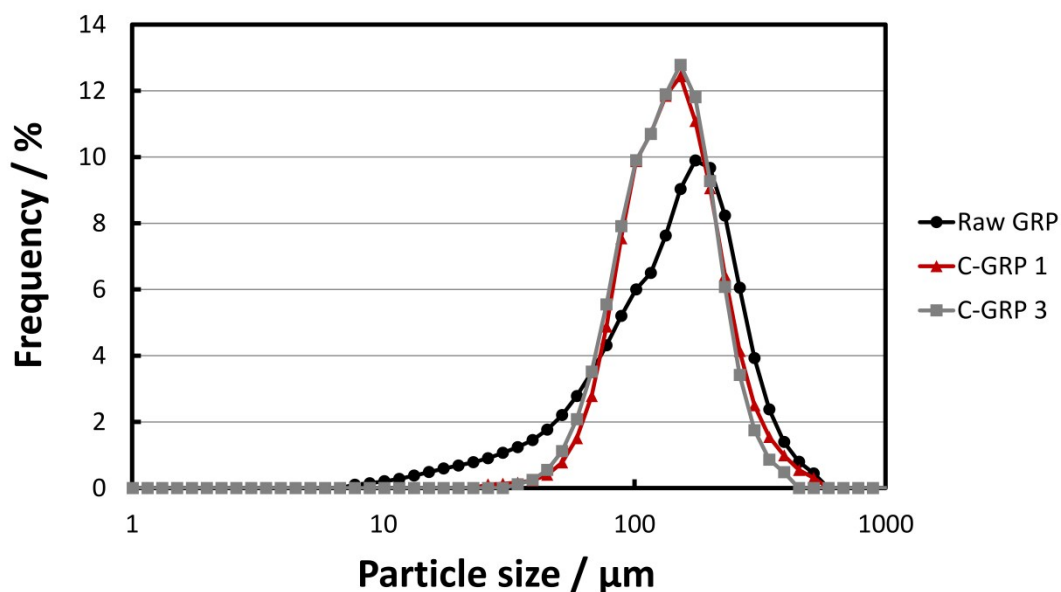

Fig. S1 Particle diameter of raw GRP, C-GRP 1, and C-GRP 3 measured by dry laser diffraction method under 0.4 MPa pressure.

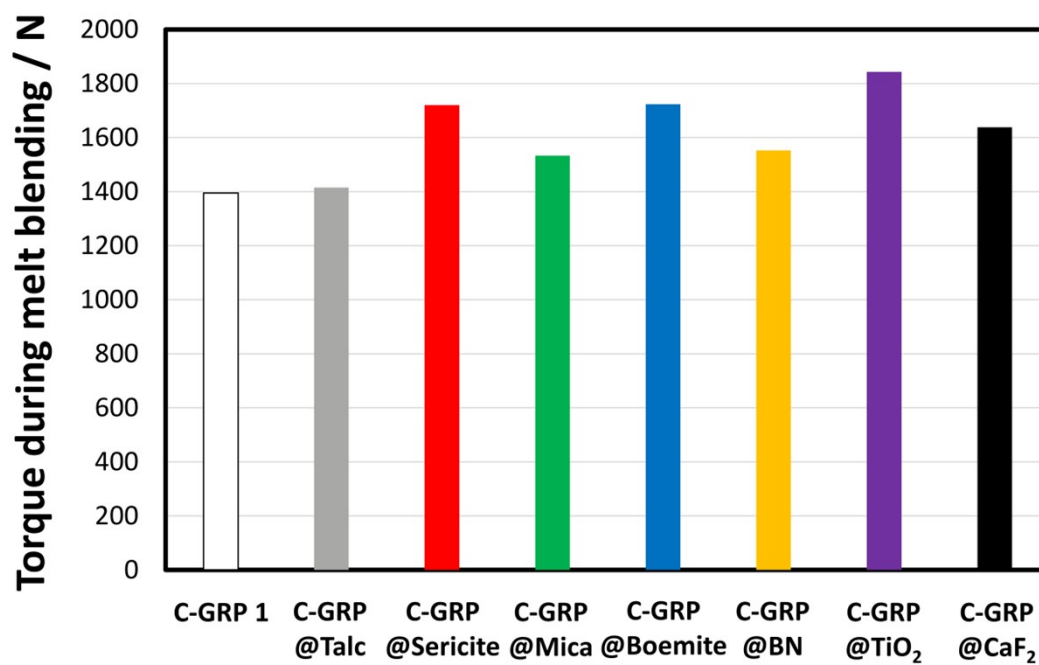

Fig. S2 Torque during melt blending of polymer with C-GRPs at screw speed of 100 rpm.
